# Supplementary material for: Carbon vacancies regulation strategy for boosting the high-temperature microwave absorption performance of (Co0.2Mo0.2V0.2Nb0.2Ta0.2)Cx high-entropy carbides
Source: Royal Society of Chemistry journal article supplement (doi:10.1039/d3tc04630c), 2024-01-01
Supplement: d3tc04630c1.pdf [file d3tc04630c1.pdf]

## Supplementary material for

**Carbon vacancies regulation strategy for boosting the high-temperature microwave absorption performance of  $(\text{Co}_{0.2}\text{Mo}_{0.2}\text{V}_{0.2}\text{Nb}_{0.2}\text{Ta}_{0.2})\text{C}_x$  high-entropy carbides**

**Yuping Duan<sup>\*1</sup>, Likun Niu<sup>1</sup>, Zerui Li<sup>1</sup>, Xiaoji Liu<sup>1</sup>, Huifang Pang<sup>1</sup>, Jiabin Ma<sup>1</sup>,  
Jian Gong<sup>2</sup>, Jiangang Wang<sup>2</sup>**

1. Key Laboratory of Solidification Control and Digital Preparation Technology (Liaoning Province), School of Materials Science and Engineering, Dalian University of Technology, Dalian 116085, P.R. China

2. China-Blarus Belt and Road Joint Laboratory on Electromagnetic Environment Effect, Taiyuan 030032, P. R. China.

\*Corresponding authors. E-mail address: [duanyp@dlut.edu.cn](mailto:duanyp@dlut.edu.cn) (Y. Duan).

ORCID iD: 0000-0001-5599-7168

## 1. Supplementary Figures

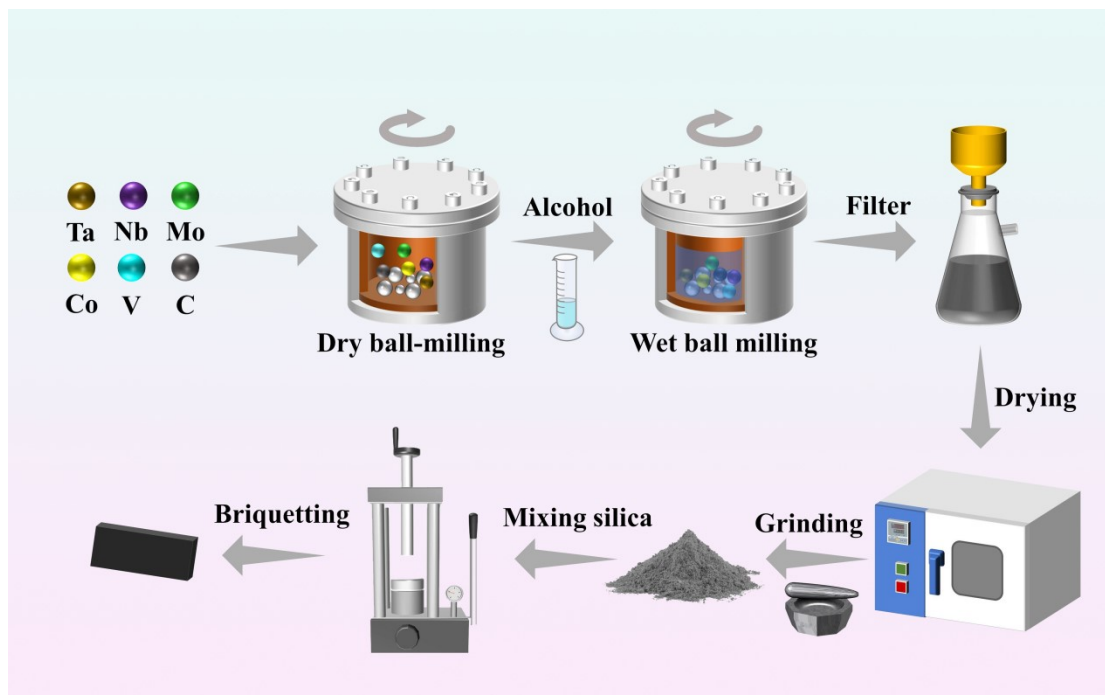

**Fig. S1.** Synthesis of  $(\text{Co}_{0.2}\text{Mo}_{0.2}\text{V}_{0.2}\text{Nb}_{0.2}\text{Ta}_{0.2})\text{C}_x$  and test sample preparation process.

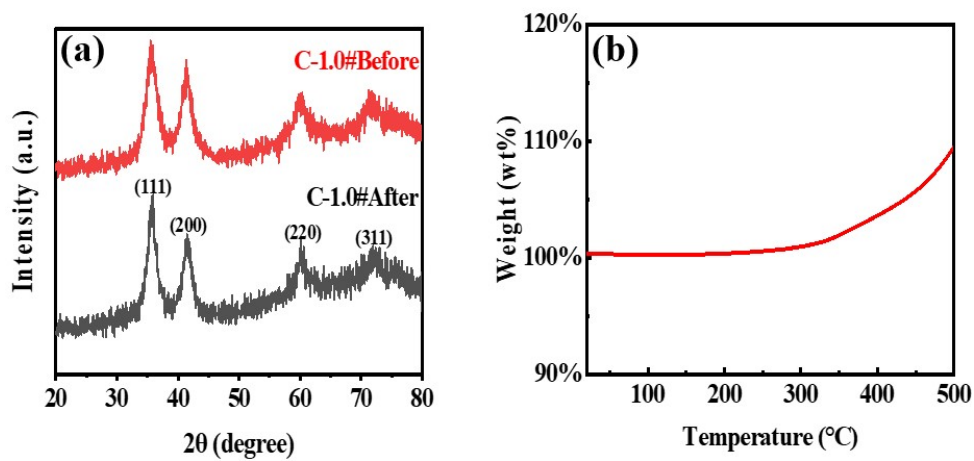

**Fig. S2.** (a) XRD patterns of  $(\text{Co}_{0.2}\text{Mo}_{0.2}\text{V}_{0.2}\text{Nb}_{0.2}\text{Ta}_{0.2})\text{C}$  HECs before and after high temperature; (b) TGA curves of  $(\text{Co}_{0.2}\text{Mo}_{0.2}\text{V}_{0.2}\text{Nb}_{0.2}\text{Ta}_{0.2})\text{C}$  HECs.

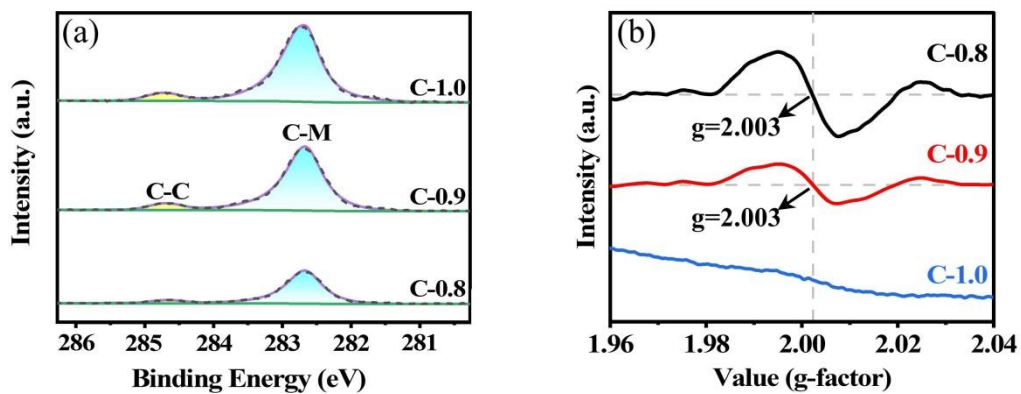

**Fig. S3.** (a) XPS data of C 1s of  $(\text{Co}_{0.2}\text{Mo}_{0.2}\text{V}_{0.2}\text{Nb}_{0.2}\text{Ta}_{0.2})\text{C}_x$  with different graphite contents; (b) EPR curves of  $(\text{Co}_{0.2}\text{Mo}_{0.2}\text{V}_{0.2}\text{Nb}_{0.2}\text{Ta}_{0.2})\text{C}_x$  with different graphite contents.

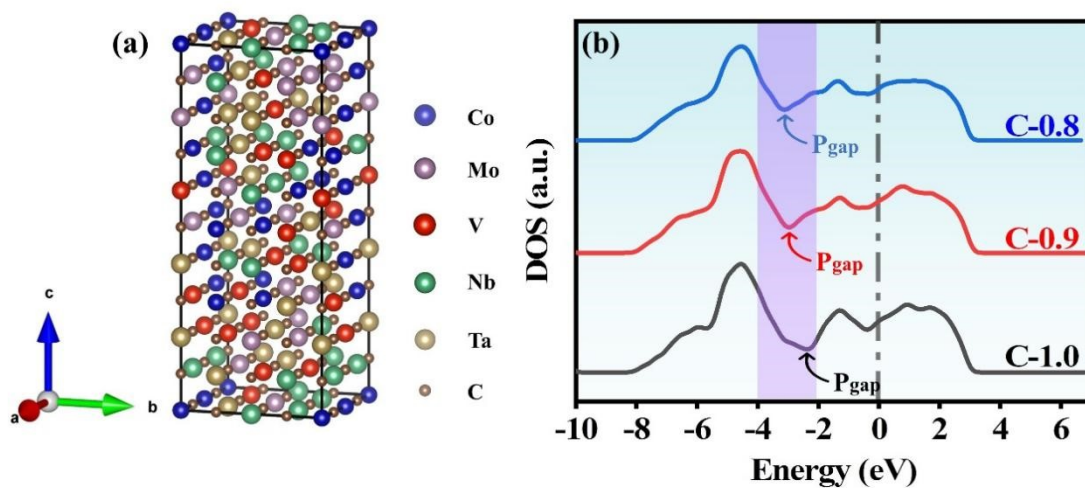

**Fig. S4.** (a)  $(\text{Co}_{0.2}\text{Mo}_{0.2}\text{V}_{0.2}\text{Nb}_{0.2}\text{Ta}_{0.2})\text{C}$  supercell for density functional theory (DFT) calculations; (b) The density of states (DOS) of the  $(\text{Co}_{0.2}\text{Mo}_{0.2}\text{V}_{0.2}\text{Nb}_{0.2}\text{Ta}_{0.2})\text{C}_x$ .

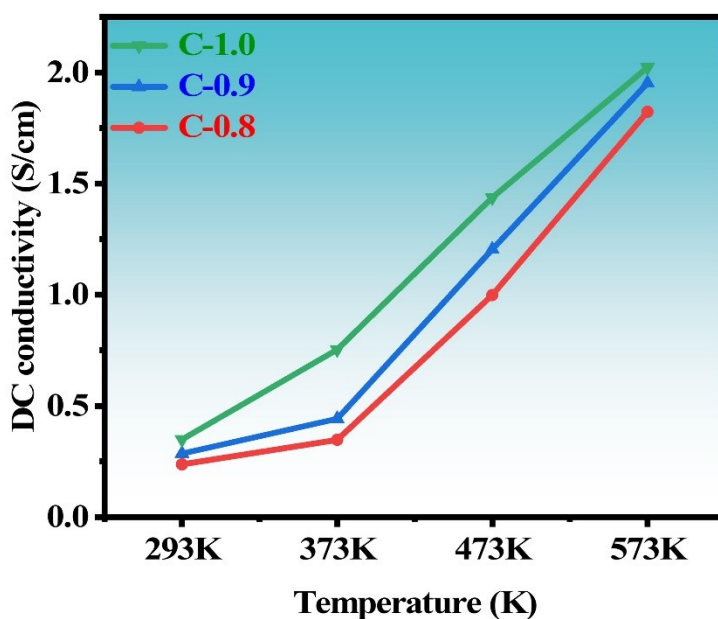

Fig. S5. Conductivity of  $(\text{Co}_{0.2}\text{Mo}_{0.2}\text{V}_{0.2}\text{Nb}_{0.2}\text{Ta}_{0.2})\text{C}_x$  HECs in the temperature range of 293– 573 K.

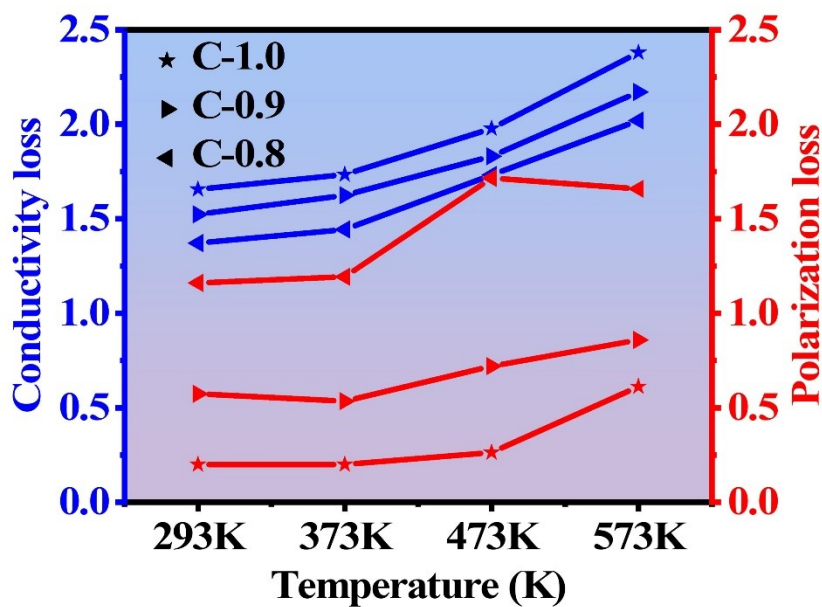

Fig. S6. Conductivity loss and polarization loss of  $(\text{Co}_{0.2}\text{Mo}_{0.2}\text{V}_{0.2}\text{Nb}_{0.2}\text{Ta}_{0.2})\text{C}_x$  high-entropy ceramics at 293 K-573 K.

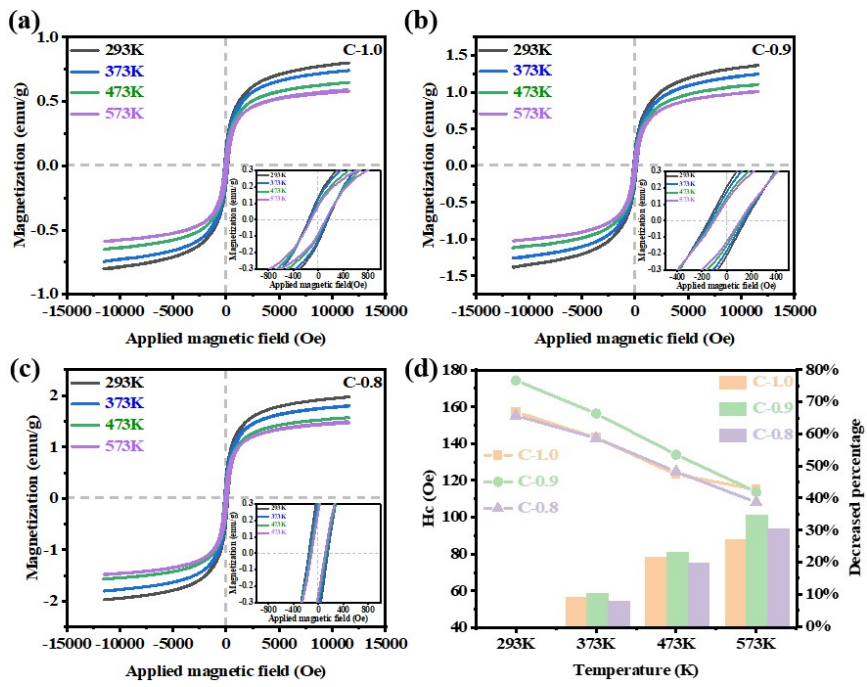

**Fig. S7** (a-c) Hysteresis lines of samples at different temperatures.  
 (d) Coercivity and its reduction at different temperatures

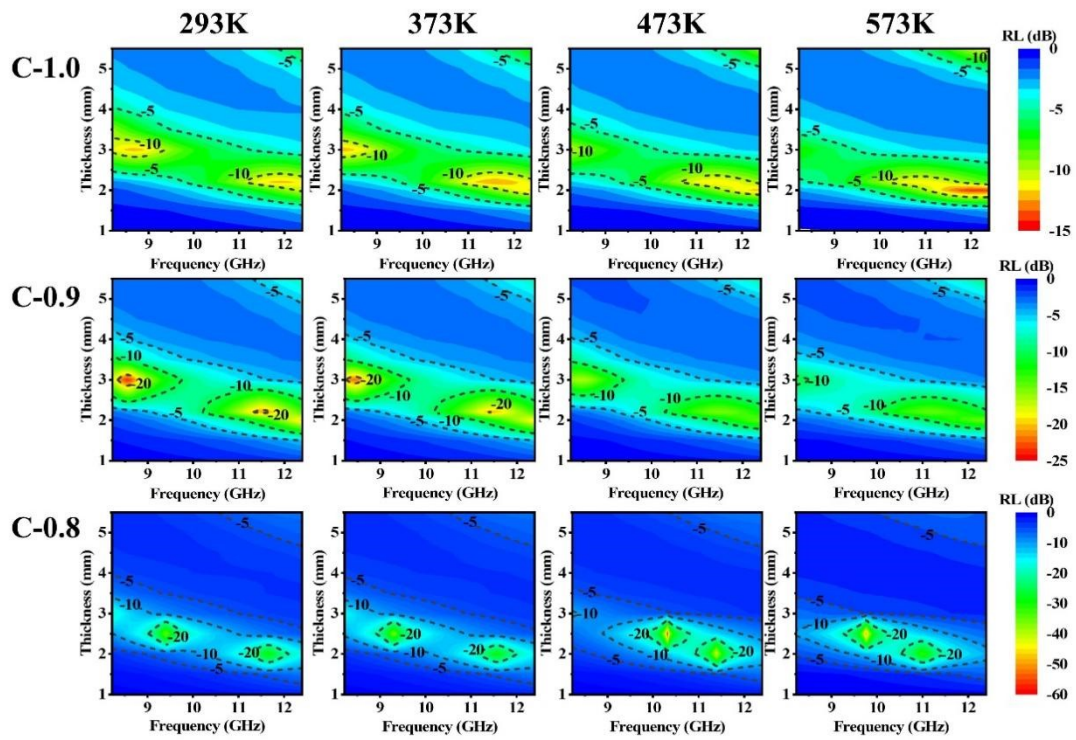

**Fig. S8.** *RL* values of  $(\text{Co}_{0.2}\text{Mo}_{0.2}\text{V}_{0.2}\text{Nb}_{0.2}\text{Ta}_{0.2})\text{C}_x$  HECs at different temperatures with different thicknesses.

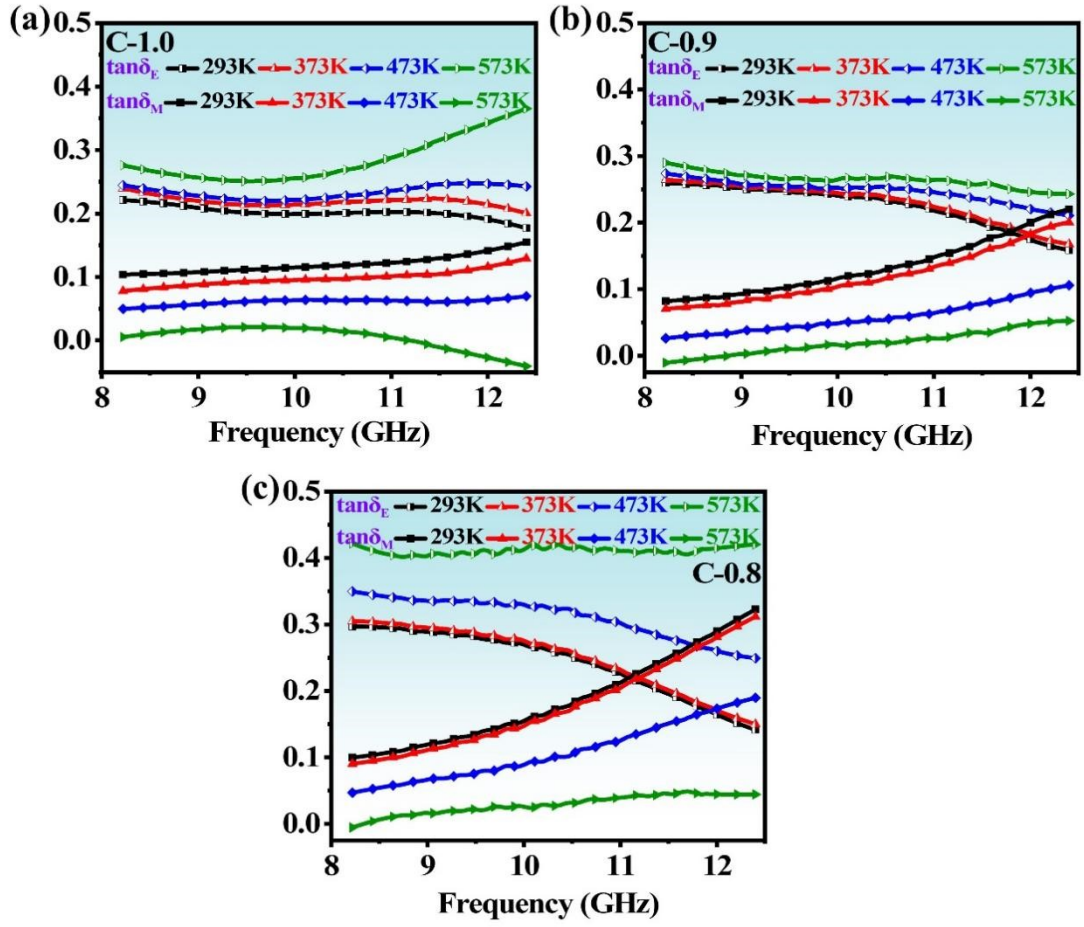

**Fig. S9.** Magnetic loss angle tangent ( $\tan\delta_M$ ) and dielectric loss angle tangent ( $\tan\delta_E$ ) of  $(\text{Co}_{0.2}\text{Mo}_{0.2}\text{V}_{0.2}\text{Nb}_{0.2}\text{Ta}_{0.2})\text{C}_x$  HECs at different temperatures.

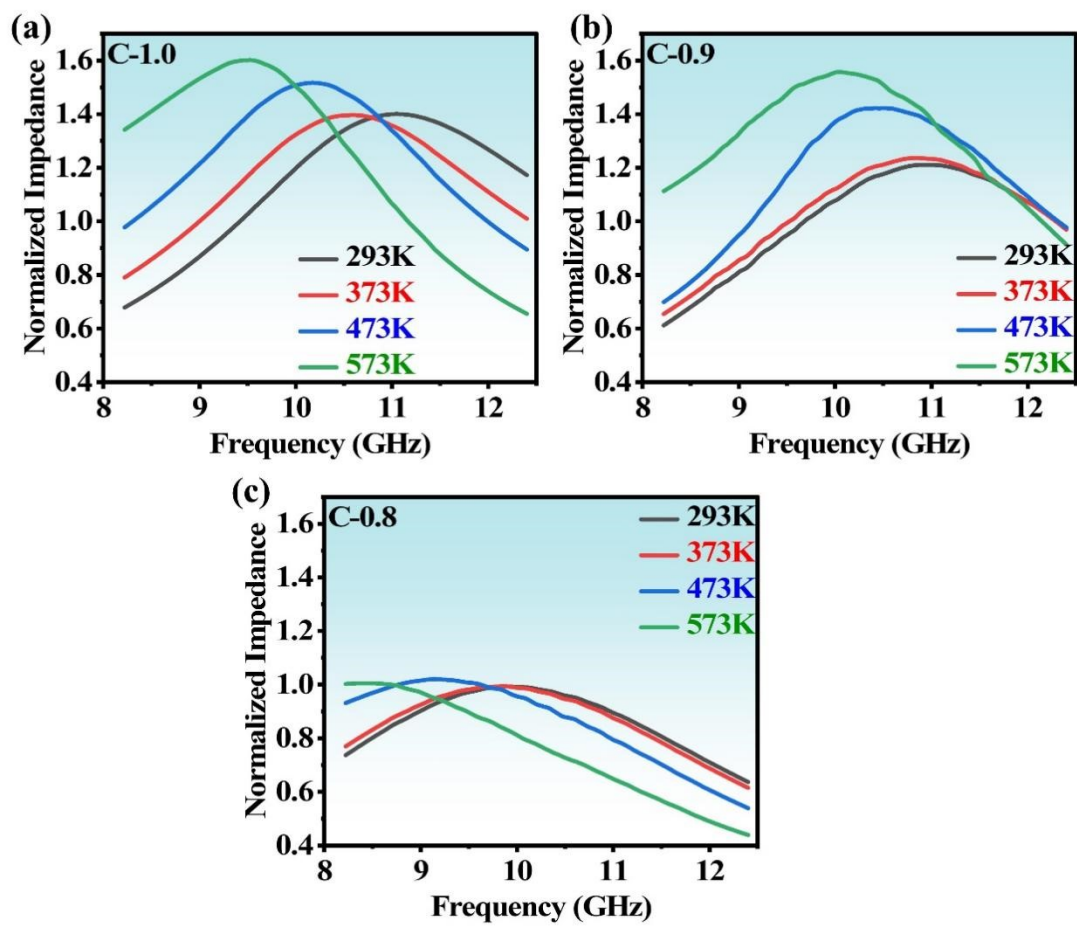

**Fig. S10.** Impedance matching curves of  $(\text{Co}_{0.2}\text{Mo}_{0.2}\text{V}_{0.2}\text{Nb}_{0.2}\text{Ta}_{0.2})\text{C}_x$  HECs at different temperatures.



## 2. Supplementary Table

**Table S1.** Content of various elements in  $(\text{Co}_{0.2}\text{Mo}_{0.2}\text{V}_{0.2}\text{Nb}_{0.2}\text{Ta}_{0.2})\text{C}$  high entropy

| ceramics |       |       |
|----------|-------|-------|
| Element  | wt%   | at%   |
| Co       | 10.71 | 9.64  |
| Mo       | 18.32 | 10.12 |
| V        | 9.03  | 9.40  |
| Nb       | 16.06 | 9.16  |
| Ta       | 33.73 | 9.88  |
| C        | 11.58 | 51.08 |
| Zr       | 0.42  | 0.24  |
| O        | 0.15  | 0.48  |

**Table S2.** Carbon and oxygen content of  $(\text{Co}_{0.2}\text{Mo}_{0.2}\text{V}_{0.2}\text{Nb}_{0.2}\text{Ta}_{0.2})\text{C}_m\text{O}_n$

HECs with their carbon, oxygen and vacancy stoichiometry.

| Lable                                | C-1.0 | C-0.9 | C-0.8 |
|--------------------------------------|-------|-------|-------|
| C content (wt%)                      | 10.16 | 9.67  | 9.23  |
| O content (wt%)                      | 0.12  | 0.16  | 0.19  |
| C stoichiometry coefficient (m)      | -     | 0.93  | 0.85  |
| O stoichiometry coefficient (n)      | -     | 0.02  | 0.02  |
| Vacancies concentration ( $V_c$ , %) | -     | 5     | 13    |

**Table S3.** Typical high-temperature microwave absorption materials and their related performance.

| Materials                                                                                 | RL <sub>min</sub><br>(dB) | Maximum<br>EAB<br>(GHz) | Temperature<br>stability<br>(GHz) | Thickness<br>(mm) | Ref.         |
|-------------------------------------------------------------------------------------------|---------------------------|-------------------------|-----------------------------------|-------------------|--------------|
| Si <sub>3</sub> N <sub>4</sub> - SiC/SiO <sub>2</sub>                                     | -52.5                     | 4.18                    | 0.15                              | 3.4               | [1]          |
| Fe-SiC/SiO <sub>2</sub>                                                                   | -14.0                     | 3.40                    | 3.30                              | 3.0               | [2]          |
| TiN/BN/SiO <sub>2</sub>                                                                   | -17.0                     | 3.26                    | 0.99                              | 2.0               | [3]          |
| TiN/<br>Fe <sub>2</sub> Ni <sub>2</sub> N/SiO <sub>2</sub>                                | -22.0                     | 3.89                    | 0.36                              | 2.8               | [4]          |
| Ni-SiC                                                                                    | -45.5                     | 3.99                    | 0.95                              | 2.1               | [5]          |
| RGO/Si <sub>3</sub> N <sub>4</sub>                                                        | -16.5                     | 4.20                    | 0                                 | 4.3               | [6]          |
| Si <sub>3</sub> N <sub>4</sub> /SiC<br>Aerogels                                           | -45.0                     | 4.20                    | 0                                 | 4.0               | [7]          |
| FeCo@ZnO                                                                                  | -20.8                     | 3.30                    | 0.90                              | 1.9               | [8]          |
| Ti <sub>3</sub> SiC <sub>2</sub> /Al <sub>2</sub> O <sub>3</sub> -<br>13%TiO <sub>2</sub> | -51.8                     | 2.12                    | 1.25                              | 2.2               | [9]          |
| SiBCNHf                                                                                   | -15.0                     | 3.67                    | 0.27                              | 2.6               | [10]         |
| C-0.8                                                                                     | -57.8                     | 3.34                    | 0.42                              | 2.2               | This<br>work |

### 3. Supplementary Note

#### 1. Details of mixing of HECs with SiO<sub>2</sub> powder

Firstly, weigh the HECs powders and SiO<sub>2</sub> powders according to the mass percentage. Next, place the weighed powder into a beaker filled with alcohol. Then, perform ultrasonic treatment on the beaker for 30 minutes. Afterwards, dry and grind.

#### 2. First-principles density functional theory (DFT) calculation methods

The density of states of (Co<sub>0.2</sub>Mo<sub>0.2</sub>V<sub>0.2</sub>Nb<sub>0.2</sub>Ta<sub>0.2</sub>)C<sub>x</sub> are investigated based on density functional theory (DFT) using the Vienna-Ab Initio Calculation Simulation Package (VASP). The solid solution structure of (Co<sub>0.2</sub>Mo<sub>0.2</sub>V<sub>0.2</sub>Nb<sub>0.2</sub>Ta<sub>0.2</sub>)C<sub>x</sub> is modeled using the Special Quasi-random Structure (SQS). In this study, a 2 × 2 × 5 SQS supercell with 160 atoms is generated using the "MCSQS" code of the Alloy Theoretic Automated Toolkit (ATAT). For the SQS model described above, a 4 × 4 × 4 Monkhorst k-point grid is adopted. The smearing (spreading) parameter and the plane wave energy cutoff is set to 0.2 eV and 400 eV, respectively. The exchange-correlation function is approximated using a Projector-Augmented Wave (PAW) potential and a modified Perdew-Burke-Ernzerhof (PBE) gradient. First, the structure is optimized without considering spin polarization, followed by static self-consistent and non-self-consistent calculations for the optimized structure based on spin polarization.

## Supplementary References

- [1] M. Li, X. Yin, G. Zheng, M. Chen, M. Tao, L. Cheng, L. Zhang, High-temperature dielectric and microwave absorption properties of  $\text{Si}_3\text{N}_4\text{-SiC/SiO}_2$  composite ceramics, *Journal of Materials Science*, 50 (2014) 1478-1487.
- [2] X. Yuan, L. Cheng, Y. Zhang, S. Guo, L. Zhang, Fe-doped  $\text{SiC/SiO}_2$  composites with ordered inter-filled structure for effective high-temperature microwave attenuation, *Materials & Design*, 92 (2016) 563-570.
- [3] Y. Shi, D. Li, H. Si, Z. Jiang, M. Li, C. Gong, TiN/BN composite with excellent thermal stability for efficiency microwave absorption in wide temperature spectrum, *Journal of Materials Science & Technology*, 130 (2022) 249-255.
- [4] Y. Shi, D. Li, H. Si, Y. Duan, C. Gong, J. Zhang, TiN/ $\text{Fe}_2\text{Ni}_2\text{N/SiO}_2$  composites for magnetic-dielectric balance to facilitate temperature-stable broadband microwave absorption, *Journal of Alloys and Compounds*, 918 (2022) 165603.
- [5] J. Yuan, H. Yang, Z. Hou, W. Song, H. Xu, Y. Kang, H. Jin, X. Fang, M. Cao, Ni-decorated SiC powders: Enhanced high-temperature dielectric properties and microwave absorption performance, *Powder Technology*, 237 (2013) 309-313.
- [6] Z. Hou, X. Yin, H. Xu, H. Wei, M. Li, L. Cheng, L. Zhang, Reduced Graphene Oxide/Silicon Nitride Composite for Cooperative Electromagnetic Absorption in Wide Temperature Spectrum with Excellent Thermal Stability, *ACS Appl Mater Interfaces*, 11 (2019) 5364-5372.
- [7] Z. Cai, L. Su, H. Wang, M. Niu, L. Tao, Lu, L. Xu, M. Li, H. Gao, Alternating Multilayered  $\text{Si}_3\text{N}_4\text{/SiC}$  Aerogels for Broadband and High-Temperature

Electromagnetic Wave Absorption up to 1000 degrees C, *ACS Appl Mater Interfaces*, 13 (2021) 16704-16712.

[8] K. Peng, C. Liu, Y. Wu, G. Fang, G. Xu, Y. Zhang, C. Wu and M. Yan, *Journal of Materials Science & Technology*, 2022, **125**, 212-221.

[9] W.C. Wang, L.Y. Wang, G. Liu, C.Q. Ge, L. Wang, B. Wang, J. Huang, *Journal of the European Ceramic Society*, 2024, **44**, 254-260.

[10] Y. Song, Z.Y. Liu, X.C. Zhang, R.Q. Zhu, Y.W. Zhang, P.G. Liu, L.H. He, J. Kong, *Journal of Materials Science & Technology*, 2022, **126**, 215-227.
